# Supplementary material for: Premature senescence of endothelial cells upon chronic exposure to TNFα can be prevented by N-acetyl cysteine and plumericin
Source: PubMed Central journal article supplement (PMC5206708; doi:10.1038/srep39501), 2017-01-03

**Premature senescence of endothelial cells upon chronic exposure to TNF $\alpha$   
can be prevented by N-acetyl cysteine and plumericin**

Shafaat Y Khan<sup>1,5</sup>, Ezzat M Awad<sup>1</sup>, Andre Oszwald<sup>1</sup>, Manuel Mayr<sup>2</sup>, Xiaoke Yin<sup>2</sup>, Birgit Waltenberger<sup>3</sup>, Hermann Stuppner<sup>3</sup>, Markus Lipovac<sup>4</sup>, Pavel Uhrin<sup>1</sup> and Johannes M. Breuss<sup>1,\*</sup>

<sup>1</sup>Department of Vascular Biology and Thrombosis Research, Center for Physiology and Pharmacology, Medical University of Vienna, 1090 Vienna, Austria.

<sup>2</sup>King's British Heart Foundation Centre, King's College London, London SE5 9NU, UK.

<sup>3</sup>Institute of Pharmacy/Pharmacognosy and Center for Molecular Biosciences Innsbruck (CMBI), University of Innsbruck, 6020 Innsbruck, Austria.

<sup>4</sup>Karl Landsteiner Institute for Cell-based Therapy in Gynecology, 2100 Korneuburg, Austria.

<sup>5</sup>Department of Zoology, University of Sargodha, 40100 Sargodha Pakistan.

\*Email: [Johannes.Breuss@meduniwien.ac.at](mailto:Johannes.Breuss@meduniwien.ac.at)

# Supplemental Information

**Supplemental Figure 1. Characterization of HDMECs.** (a) Increased portion of p16 positive cells and (b) an increase in size and pronounced cell flattening after six days of TNF $\alpha$  (10ng) treatment. (c) Increased IL-6 and (d) IL-8 levels after six days of TNF $\alpha$  treatment. Values are presented as mean  $\pm$  SD . (\*\*\*)p<0.001). The results shown are derived from a single experiment in technical triplicates (a) or in duplicates (c,d).

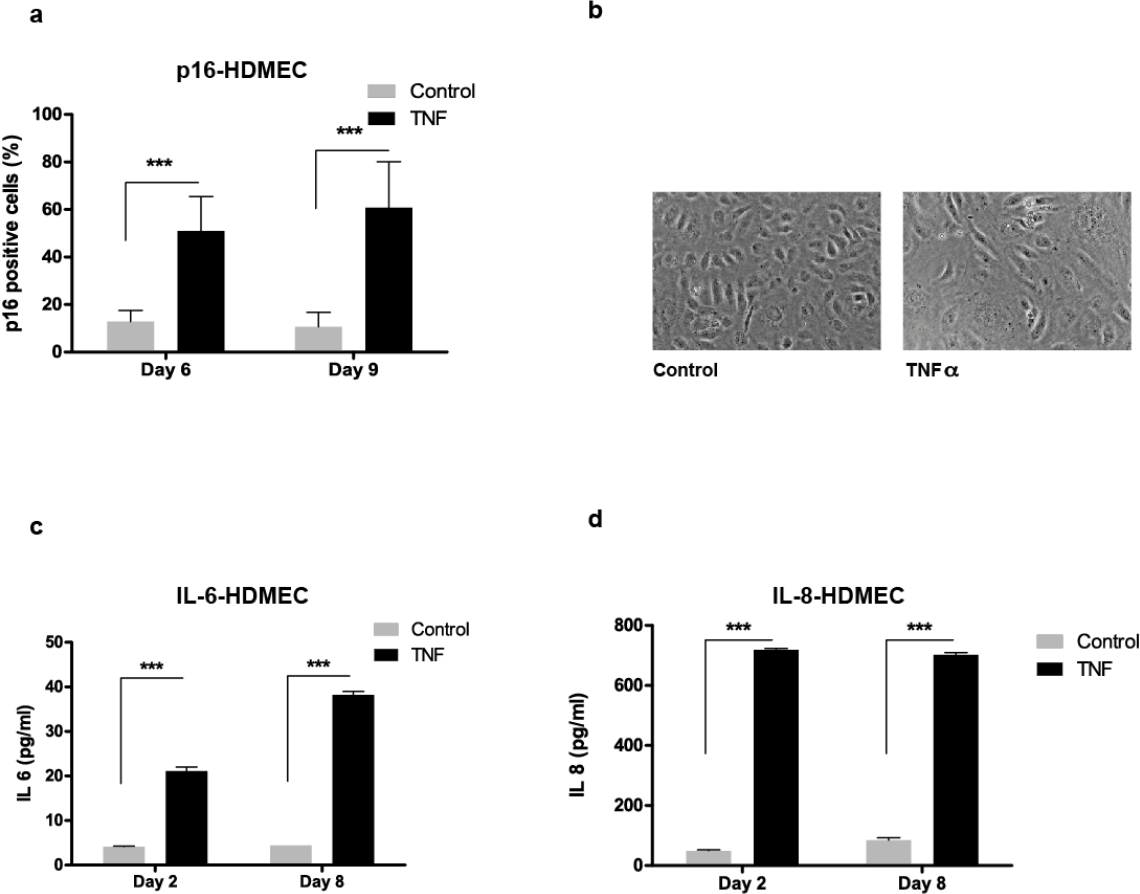

**Supplemental Figure 2. Effects of cultivation of HUVECs in the presence of TNF $\alpha$  for six days, followed by an additional 7-10 days period without TNF $\alpha$ .** (a) Retardation of growth in TNF $\alpha$  (10ng) treated HUVECs. (b) Increased portion of p16 positive cells after TNF $\alpha$  treatment, as assessed at days 13 and 16. Increased levels of (c) IL-6 and (d) IL-8 throughout the entire analyzed period. (e) Elevated ROS production in TNF $\alpha$  treated cells at days 8, 10 and 13 as compared to controls cells. (f) Quantification of apoptosis as determined by annexin V and propidium iodide staining and subsequent evaluating of at least 300 cells. H<sub>2</sub>O<sub>2</sub> was used as positive control for the induction of apoptosis. Values are presented as mean  $\pm$  SD of a single experiment in technical triplicates (a,b,e,f) or duplicates (c,d). (\*\*\*)p<0.001).

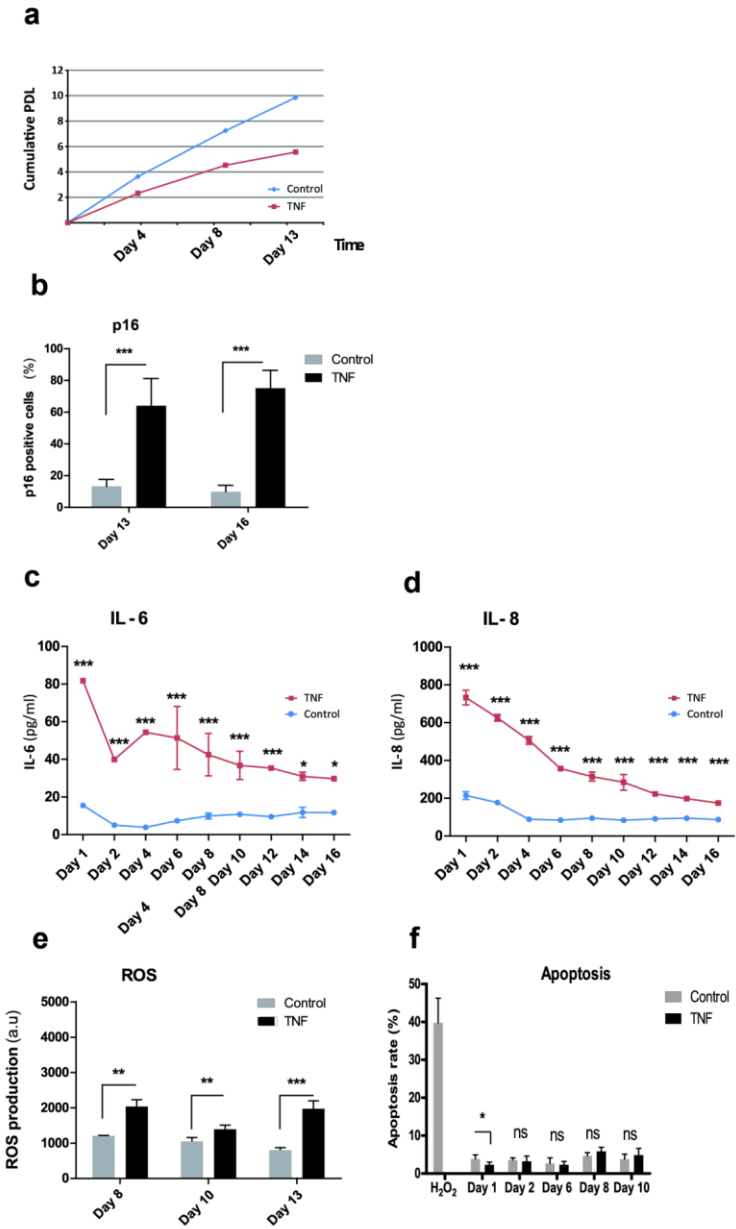

**Supplemental Figure 3. Effects of plumericin, PHA-408, and NAC on growth rates and cytokine secretion in HUVECs.**

**(a)** Growth curves of HUVECs treated with inhibitors only. The results shown are representative of three independent experiments accomplished in technical triplicates. Levels of **(b)** IL-6 and **(c)** IL-8 in HUVECs treated with inhibitors only. The results shown are derived from a single experiment in technical duplicates. PL: plumericin, PHA: PHA-408, NAC: N-acetyl cysteine.

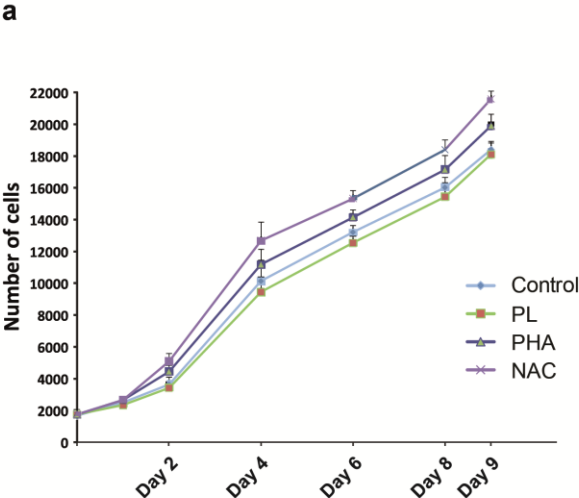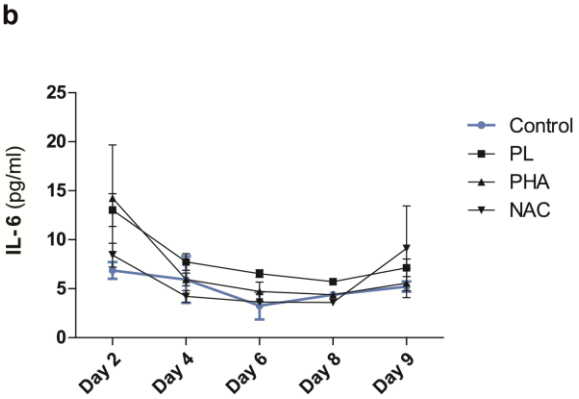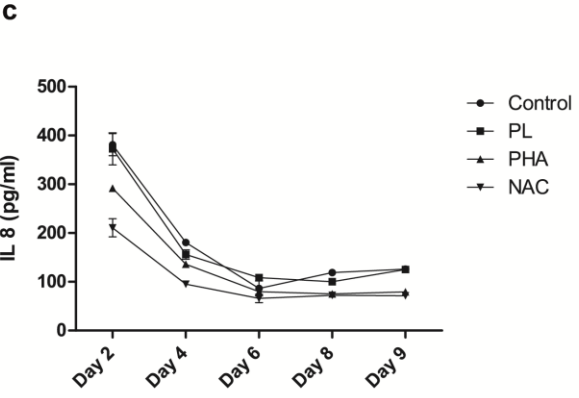

Supplement: srep39501-s1.pdf [file srep39501-s1.pdf]
